# Supplementary material for: FOXM1 drives proximal tubule proliferation during repair from acute ischemic kidney injury
Source: JCI journal article supplement (doi:10.1172/jci125519), 2019-11-10
Supplement: sd1 [file 1]

## **Supplemental information**

### **FoxM1 drives proximal tubule proliferation during repair from acute ischemic kidney injury**

Monica Chang-Panesso, Farid F. Kadyrov, Matthew Lalli, Haojia Wu, Shiyo Ikeda, Eirini Kefaloyianni, Mai M. Abdelmageed, Andreas Herrlich, Akio Kobayashi and Benjamin D. Humphreys

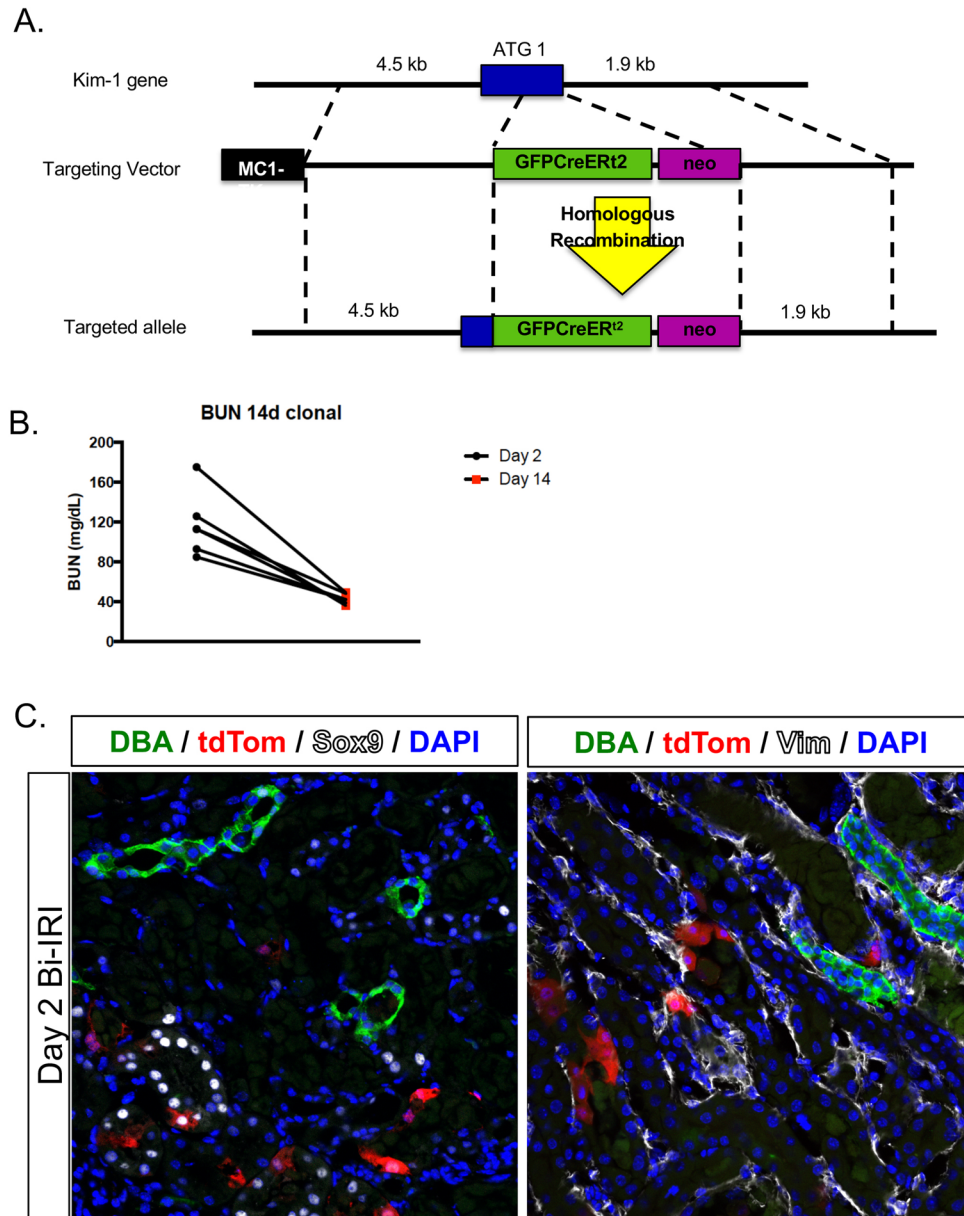

**Supplemental Figure 1. A.** Targeting strategy design for Kim1-GFPCreERT2 knock-in allele. A targeting vector was used to insert the EGFRPCreERT2 (GCE) transgene and a frt-flanked PGKneobpA selection cassette into the ATG codon of the Havcr1 gene. **B.** BUN increased between 80-150 mg/dL at 48 hours after injury and downtrended at day 14 as expected. **C.** Immunostaining with DBA, a distal tubular marker, and markers of dedifferentiation (Sox9 and Vimentin) in day 2 Bi-IRI kidney.

A.

| Fraction | Group      | RNA mass (ng) | STDEV    | RIN |
|----------|------------|---------------|----------|-----|
| Bound    | Sham       | 30.64         | 37.37    | 9.3 |
|          | Day 2 IRI  | 67.31         | 25.75    | 9.0 |
|          | Day 7 IRI  | 271.20        | 184.64   | 9.4 |
|          | Day 14 IRI | 293.92        | 258.22   | 9.6 |
| Unbound  | Sham       | 15224.59      | 11012.13 | 9.7 |
|          | Day 2 IRI  | 23399.00      | 5405.53  | 9.6 |
|          | Day 7 IRI  | 29291.90      | 4377.96  | 10  |
|          | Day 14 IRI | 18779.92      | 5434.56  | 9.3 |

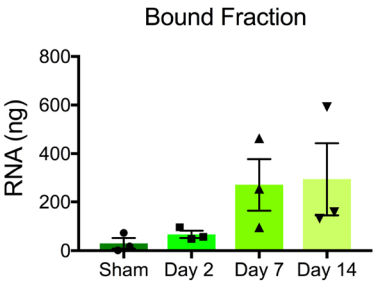

B.

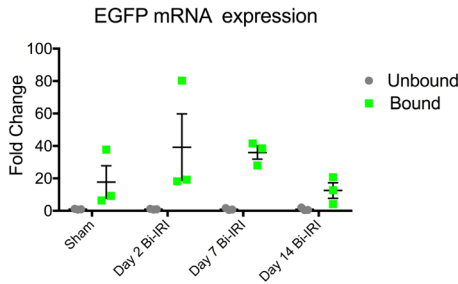

C.

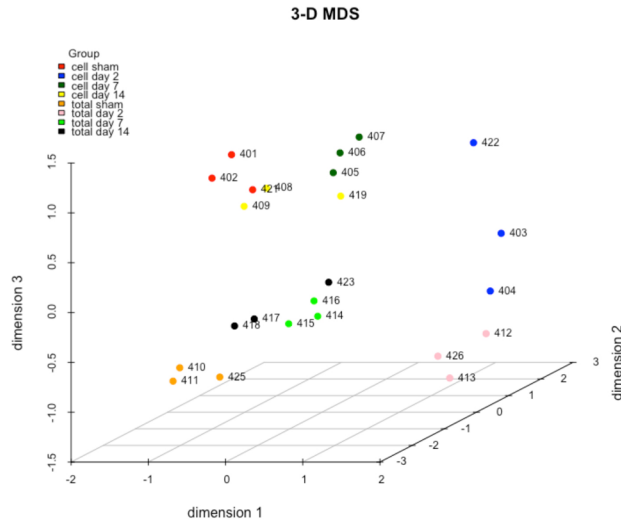

**Supplemental Figure 2. A.** Amount of isolated RNA from TRAP at the different points after injury. **B.** qPCR for EGFP in bound vs unbound fraction in sham vs. day 2 after injury. **C.** MDS plot showing good clustering of the samples in cell (bound) vs. total (unbound) at the different time points.

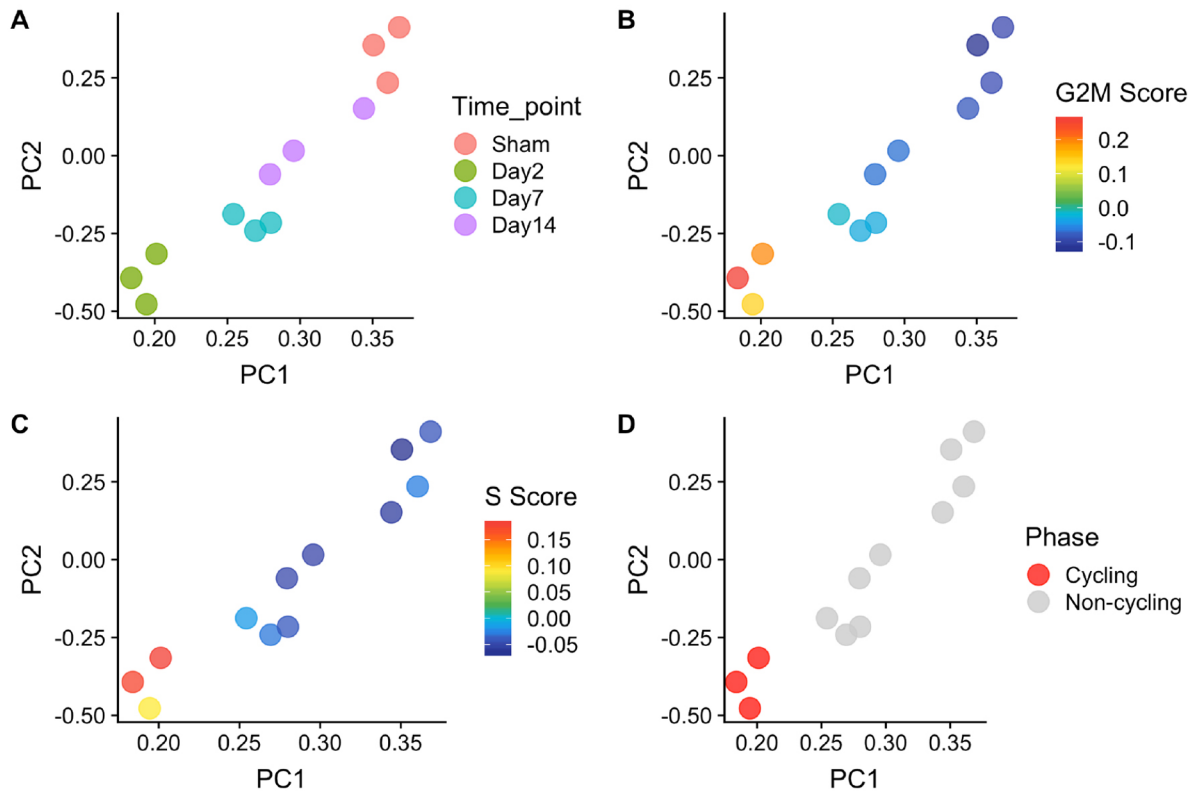

**Supplemental Figure 3.** Bioinformatic analysis of cell cycle gene expression in the Kim1-GCE TRAP samples across time. **A.** Principal component analysis (PCA) based on the expression of marker genes related to G2M and S phases. **B.** Visualization of the G2M phase score for each sample on the PCA plot. **C.** Visualization of the S phase score for each sample on the PCA plot. **D.** PCA plot illustrating the cell cycle state for each sample. Samples were assigned to “Cycling” if they are in G2M or S phase and “Non Cycling” otherwise.
